# Supplementary material for: A Network Model of Resilience Factors for Adolescents with and without Exposure to Childhood Adversity
Source: Springer Nature journal article supplement (doi:10.1038/s41598-018-34130-2), 2018-10-19
Supplement: MOESM1 [file 41598_2018_34130_MOESM1_ESM%281%29.pdf]

DSpace


  

 Skip to main content

- English
- Català
- Čeština
- Deutsch
- Español
- Français
- Gàidhlig
- Latviešu
- Magyar
- Nederlands
- Polski
- Português
- Português do Brasil
- Suomi
- Svenska
- Türkçe
- Қазақ
- বাংলা
- हिंदी
- Ελληνικά
- Yкраї́нська

- Log In

  Please note that log in via username/password is only available to Repository staff.

   Log in with Shibboleth
  Email addressPassword Log in

  Have you forgotten your password?

- English
- Català
- Čeština
- Deutsch
- Español
- Français
- Gàidhlig
- Latviešu
- Magyar
- Nederlands
- Polski
- Português
- Português do Brasil
- Suomi
- Svenska
- Türkçe
- Қазақ
- বাংলা
- हिंदी
- Ελληνικά
- Yкраї́нська

- Log In

  Please note that log in via username/password is only available to Repository staff.

   Log in with Shibboleth
  Email addressPassword Log in

  Have you forgotten your password?

##### Apollo

- About us
- Contact us
- Governance and policies
- Notice and takedown

##### Cambridge University Library

- Accessibility
- Privacy policy
- Copyright

##### Tools

- Login

University of Cambridge © 2024

- Cookie settings
- Privacy policy
- Terms of Use
